# Supplementary material for: An Asymptomatic, Ectopic Mass as a Presentation of Adrenocortical Carcinoma Due to a Novel Germline TP53 p.Phe338Leu Tetramerisation Domain Variant
Source: MDPI journal article supplement (doi:10.3390/children10111793), 2023-11-07
Supplement: s1 [file s1]

|                        |                                          |          |
|------------------------|------------------------------------------|----------|
| Variant                | TP53(NM_000546.6):c.1012T>C, p.Phe338Leu |          |
| Frequency              |                                          |          |
| gnomAD Genomes         | not found                                |          |
| gnomAD exomes          | not found                                |          |
| Conservation           |                                          |          |
| Scores                 | Value                                    |          |
| PhastCons100way        | 0.897                                    |          |
| PhyloP100way           | 8.183                                    |          |
| Pathogenicity Scores   |                                          |          |
| Meta scores            |                                          |          |
| Engine                 | Calibrated Prediction                    | Score    |
| BayesDel addAF         | Pathogenic Moderate                      | 0.2279   |
| MetaLR                 | Pathogenic Supporting                    | 0.8532   |
| MetaRNN                | Pathogenic Supporting                    | 0.7701   |
| MetaSVM                | Pathogenic Supporting                    | 0.8849   |
| BayesDel noAF          | Uncertain                                | 0.08959  |
| REVEL                  | Uncertain                                | 0.681    |
| Individual Predictions |                                          |          |
| DEOGEN2                | Pathogenic Moderate                      | 0.9628   |
| EVE                    | Pathogenic Supporting                    | 0.6595   |
| FATHMM-MKL             | Pathogenic Supporting                    | 0.9935   |
| FATHMM-XF              | Pathogenic Supporting                    | 0.9229   |
| LIST-S2                | Pathogenic Supporting                    | 0.9725   |
| M-CAP                  | Pathogenic Supporting                    | 0.4196   |
| MutPred                | Pathogenic Supporting                    | 0.706    |
| LRT                    | Benign Supporting                        | 0.005234 |
| BLOSUM                 | Uncertain                                | 0        |
| CADD                   | Uncertain                                | 25.3999  |
| DANN                   | Uncertain                                | 0.9961   |
| EIGEN                  | Uncertain                                | 0.3318   |
| FATHMM                 | Uncertain                                | -3.47    |
| Mutation assessor      | Uncertain                                | 2.77     |
| MutationTaster         | Uncertain                                | 0.9985   |
| MVP                    | Uncertain                                | 0.9348   |
| Polyphen2 HDIV         | Uncertain                                | 0.787    |
| Polyphen2 HVAR         | Uncertain                                | 0.595    |
| PrimateAI              | Uncertain                                | 0.5514   |
| PROVEAN                | Uncertain                                | -3.77    |
| SIFT                   | Uncertain                                | 0.002    |
| SIFT4G                 | Uncertain                                | 0.005    |

[illegible]
