# Supplementary material for: An Asymptomatic, Ectopic Mass as a Presentation of Adrenocortical Carcinoma Due to a Novel Germline TP53 p.Phe338Leu Tetramerisation Domain Variant
Source: MDPI journal article supplement (doi:10.3390/children10111793), 2023-11-07

Molecular  
karyotype

arr[GRCh37] 1p36.33p35.1(11828\_33795701)x3[0.2],1q44(247365848\_249213976)x1[0.15~0.2],(3)x3[0.4],  
(4p)x3,4p15.33p11(15131588\_49051765)x3 hmz,(4q)x1[0.45],(7)x3[0.4],(8)x2 hmz,9p21.11(33025604\_71021717)x3[0.3~0.5],  
9q22.2q31.1(93219948\_102845908)x3[0.4],9q31.1q34.3(102861967\_141134447)x3~4,9q31.1q31.2(103910778\_110112190)x3~4 hmz,  
9q31.3q34.3(111525039\_141011581)x3~4 hmz,(11)x2 hmz,(12)x2~3,12p13.33p13.31(192220\_6277311)x2~3 hmz,(13)x3[0.65],  
15q11.1q24.3(20636006\_77712455)x3[0.6],15q24.3q26.3(77739599\_102519341)x4[0.4],17p13.3p12(5343\_10944407)x1,  
17p13.1p11.1(10565963\_22217680)x2 hmz,17q11.1q25.3(25343371\_81041938)x2 hmz,18q21.33q23(61583609\_78005819)x2~<2,  
(19,20)x3[0.6],21q11.2q21.3(14410158\_28217699)amp hmz,21q21.3q22.12(28231042\_36811656)x3 hmz[0.4]

Karyoview

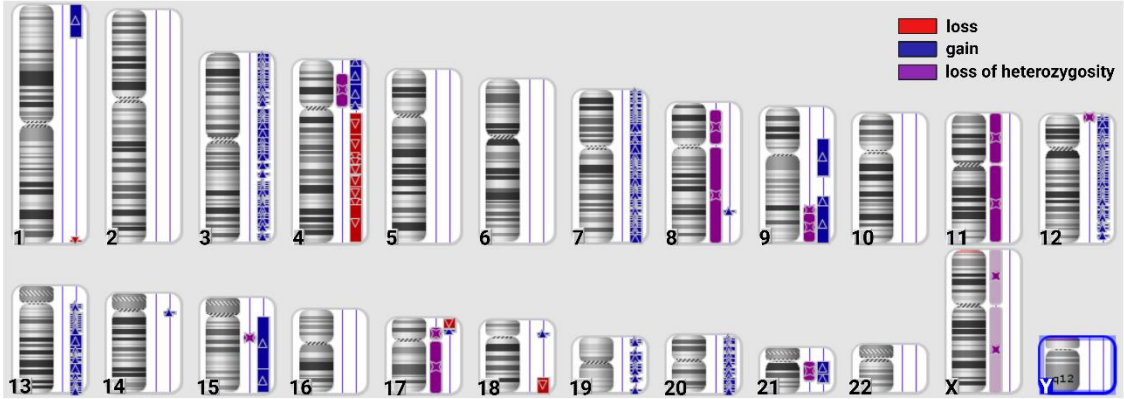

Whole  
genome view

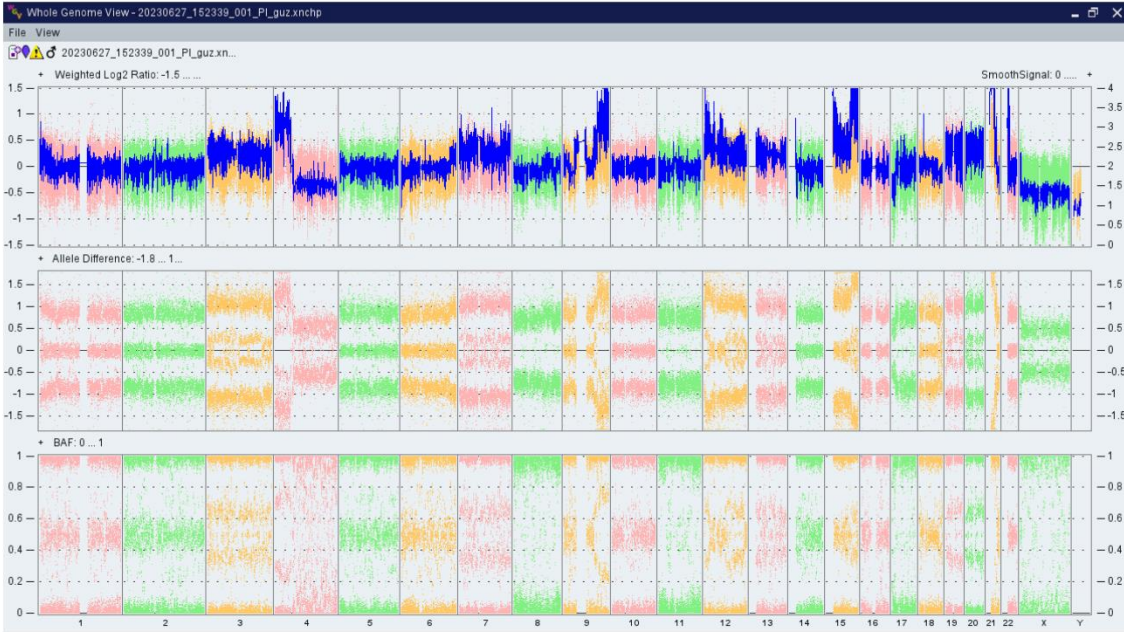

Supplement: s1 [file s1]
